# Supplementary material for: AGEs and sRAGE Variations at Different Timepoints in Patients with Chronic Kidney Disease
Source: MDPI journal article supplement (doi:10.3390/antiox10121994), 2021-12-15
Supplement: s1 [file s1]

## Supplementary Materials

**Table S1** pharmacologic treatment at baseline (BL) and follow-up (FU)

| <b>Pharmacologic agents</b> | <b>BL<br/>n (%)</b> | <b>FU<br/>n (%)</b> |
|-----------------------------|---------------------|---------------------|
| RAS inhibitors              | 34 (53)             | 27 (42)             |
| Diuretics                   | 29 (45)             | 35 (55)             |
| Statins                     | 46 (72)             | 49 (76)             |
| Bicarbonate                 | 24 (38)             | 28 (44)             |
| Allopurinol                 | 50 (78)             | 47 (73)             |
| Hypoglycaemic agents        | 24 (37)             | 26 (41)             |

RAS, renin-angiotensin system.

**Table S2** Metabolic and renal function parameters of recruitable patients and deceased/dialyzed at baseline

| <b>Variables</b>              | <b>Recruitable<br/>patients<br/>(n=98)</b> | <b>Dialysis/Death<br/>(n=34)</b> | <b>p</b>          |
|-------------------------------|--------------------------------------------|----------------------------------|-------------------|
| eGFR, (ml/min)                | 27±10                                      | 17±8                             | <b>&lt;0.0001</b> |
| Age, (years)                  | 80 [74;84]                                 | 79 [74;85]                       | 0.78              |
| BMI (kg/m <sup>2</sup> )      | 28.4±4.8                                   | 26.1±3.9                         | 0.61              |
| Fasting blood Glucose (mg/dl) | 104 [93;139]                               | 101 [86;131]                     | 0.16              |
| Albumin (g/dl)                | 4.0±0.3                                    | 4±0.4                            | 0.11              |
| Uric Acid (mg/dl)             | 6.0±1.3                                    | 6.5±1.6                          | 0.31              |
| Total Cholesterol (mg/dl)     | 165±30                                     | 176±48                           | 0.09              |
| HDL (mg/dl)                   | 48 [40;60]                                 | 54 [44;66]                       | 0.12              |
| LDL (mg/dl)                   | 84 [68;102]                                | 87 [67;116]                      | 0.49              |
| Triglycerides (mg/dl)         | 117 [94;153]                               | 111 [87;150]                     | 0.21              |
| HbA1c (mmol/dl)               | 48.5±11                                    | 43±10                            | <b>0.05</b>       |
| Proteinuria (mg/24h)          | 456 [206;1090]                             | 977 [204;3073]                   | 0.10              |
| Systolic Pressure (mmHg)      | 135 [125;144]                              | 130 [110;148]                    | 0.22              |
| Diastolic Pressure (mmHg)     | 80 [70;89]                                 | 90 [66;110]                      | 0.31              |

eGFR: estimated glomerular filtration rate; HbA1c: glycated hemoglobin; HDL: high density lipoprotein; LDL: Low density lipoprotein.
